# Supplementary material for: Fe3N Nanoparticle-Encapsulated N-Doped Carbon Nanotubes on Biomass-Derived Carbon Cloth as Self-Standing Electrocatalyst for Oxygen Reduction Reaction
Source: MDPI journal article supplement (doi:10.3390/nano13172439), 2023-08-28
Supplement: s1 [file s1]

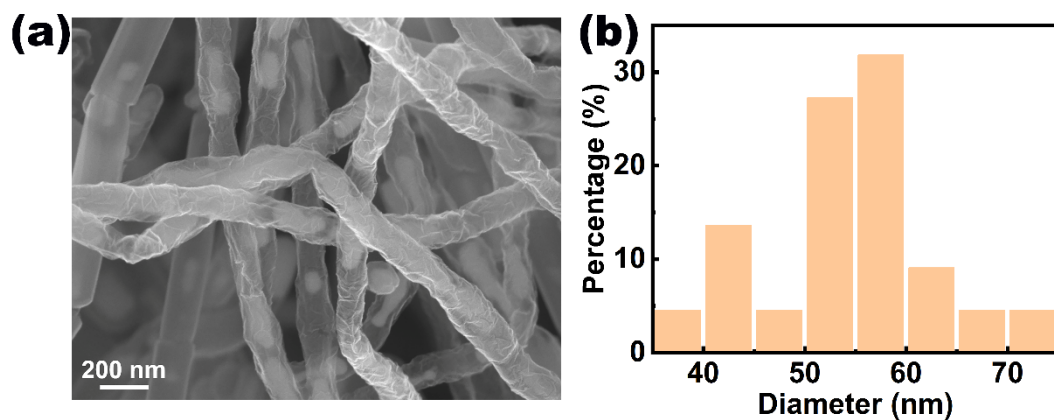

**Figure S1.** (a)STEM image of Fe<sub>3</sub>N@CNT/CC, (b)Histogram of the size distribution of nanoparticles.

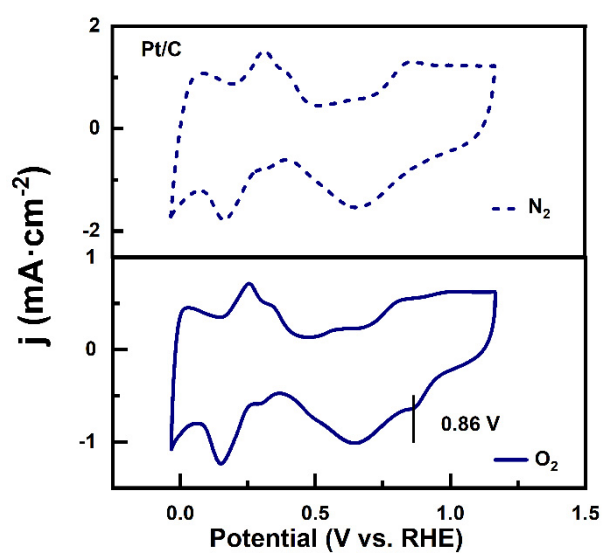

**Figure S2.** CV curves of the Pt/C in N<sub>2</sub> (dashed line) and O<sub>2</sub> (solid line) saturated 0.1 M KOH electrolyte with a scan rate of 10 mV·s<sup>-1</sup>.

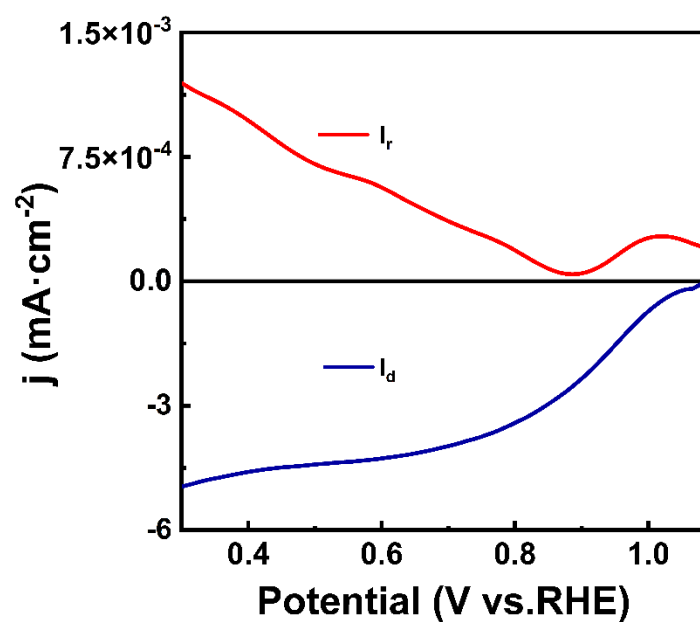

**Figure S3.** RRDE voltammograms of Fe<sub>3</sub>N@CNT/CC at a rotation rate of 1600 rpm

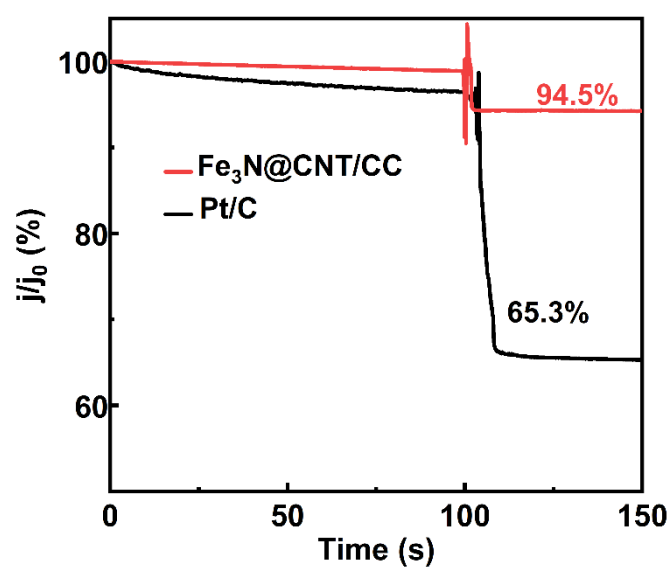

**Figure S4.** The chronoamperometric curves of Fe<sub>3</sub>N@CNT/CC and Pt/C acquired by injecting 1.0 M methanol at 100 s

**Table S1.** Proportion of element content

| Element             | C     | N     | O     | Fe     |
|---------------------|-------|-------|-------|--------|
| Weight fraction (%) | 72.23 | 5.067 | 2.182 | 20.096 |
| Molar fraction(%)   | 82.4  | 5.0   | 1.9   | 4.9    |

**Table S2.** Atomic percentage of C, N, O, Fe on the surface of Fe<sub>3</sub>N@CNT/CC

| Element           | C     | N     | O     | Fe    |
|-------------------|-------|-------|-------|-------|
| Molar fraction(%) | 47.15 | 17.88 | 23.69 | 11.28 |
